# Supplementary material for: MiR-34a-3p alters proliferation and apoptosis of meningioma cells in vitro and is directly targeting SMAD4, FRAT1 and BCL2
Source: PubMed Central journal article supplement (PMC5391240; doi:10.18632/aging.101201), 2017-03-23
Supplement: aging-09-932-s001.pdf [file aging-09-932-s001.pdf]

## SUPPLEMENTARY MATERIALS

### Supplemental Figure.

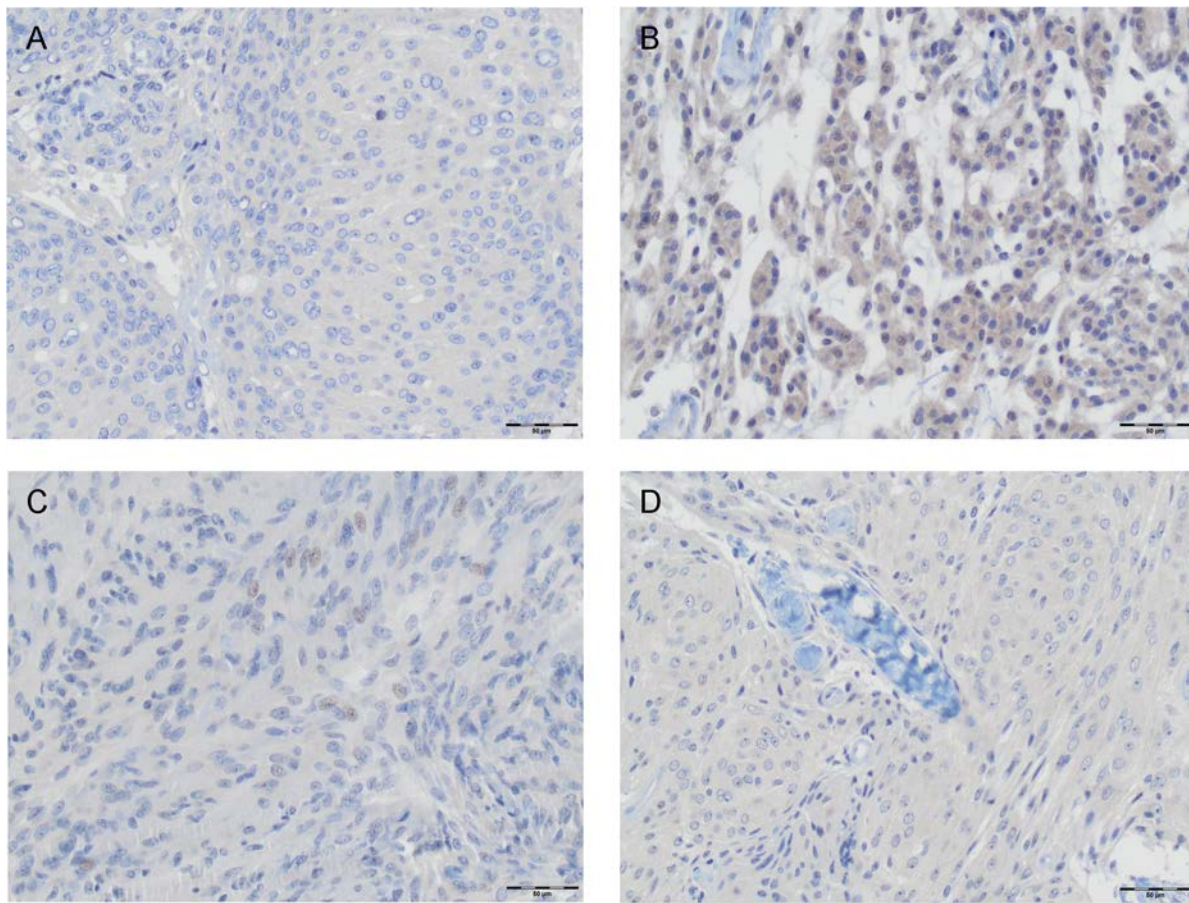

**Supplemental Figure S1. Immunohistochemistry for detection of FRAT1 and SMAD4 protein levels in FFPE samples.** Protein levels were semiquantified using the Immuno-Reactive-Score (IRS). (A, B) Representative images for FRAT1 staining for samples with an IRS of 4 (A) and 12 (B). (C, D) Representative images for SMAD4 staining with an IRS of 4 (C) and 8 (D). Scale bar 50 µm.

Supplemental Tables.

**Table S1. Raw cell counts for Ben-Men-1 cells after transfection with miR-34a-3p.**

| Hours | miR-34a-3p |        |        | Mean      | SD       | scrambled |        |        | Mean      | SD       | non-transfected |        |        | Mean      | SD       |
|-------|------------|--------|--------|-----------|----------|-----------|--------|--------|-----------|----------|-----------------|--------|--------|-----------|----------|
|       | 1          | 2      | 3      |           |          | 1         | 2      | 3      |           |          | 1               | 2      | 3      |           |          |
| 0     | 20000      | 20000  | 20000  | 20000     | 0        | 20000     | 20000  | 20000  | 20000     | 0        | 20000           | 20000  | 20000  | 20000     | 0        |
|       | 20000      | 20000  | 20000  |           |          | 20000     | 20000  | 20000  |           |          | 20000           | 20000  | 20000  |           |          |
| 72    | 117000     | 106000 | 124000 | 112000    | 7724,42  | 143000    | 113000 | 147000 | 121883,33 | 18735,03 | 154000          | 145000 | 176000 | 149500    | 14705,44 |
|       | 117000     | 104000 | 104000 |           |          | 104000    | 97300  | 127000 |           |          | 143000          | 127000 | 152000 |           |          |
| 96    | 179000     | 156000 | 152000 | 178000    | 19874,61 | 244000    | 199000 | 251000 | 225000    | 23194,83 | 251000          | 256000 | 263000 | 253166,67 | 5112,62  |
|       | 204000     | 201000 | 176000 |           |          | 224000    | 242000 | 190000 |           |          | 251000          | 251000 | 247000 |           |          |
| 120   | 258000     | 267000 | 235000 | 251666,67 | 14510,53 | 285000    | 315000 | 269000 | 295000    | 20289,57 | 468000          | 471000 | 414000 | 450333,33 | 25031,09 |
|       | 256000     | 265000 | 229000 |           |          | 292000    | 281000 | 328000 |           |          | 453000          | 419000 | 477000 |           |          |

**Table S2. Raw cell counts for Ben-Men-1 cells after transfection with anti-miR-34a-3p.**

| Hours | anti-miR-34a-3p |        |        | Mean      | SD       | scrambled |        |        | Mean      | SD       | non-transfected |        |        | Mean      | SD       |
|-------|-----------------|--------|--------|-----------|----------|-----------|--------|--------|-----------|----------|-----------------|--------|--------|-----------|----------|
|       | 1               | 2      | 3      |           |          | 1         | 2      | 3      |           |          | 1               | 2      | 3      |           |          |
| 0     | 20000           | 20000  | 20000  | 20000     | 0        | 20000     | 20000  | 20000  | 20000     | 0        | 20000           | 20000  | 20000  | 20000     | 0        |
|       | 20000           | 20000  | 20000  |           |          | 20000     | 20000  | 20000  |           |          | 20000           | 20000  | 20000  |           |          |
| 72    | 104000          | 88200  | 102000 | 99866,67  | 12623,61 | 106000    | 131000 | 106000 | 117216,67 | 14484,52 | 174000          | 172000 | 174000 | 169666,67 | 7063,21  |
|       | 124000          | 95000  | 86000  |           |          | 129000    | 97300  | 134000 |           |          | 172000          | 154000 | 172000 |           |          |
| 96    | 140000          | 163000 | 183000 | 166666,67 | 19618,59 | 231000    | 213000 | 181000 | 199166,67 | 19878,10 | 251000          | 226000 | 274000 | 245333,33 | 14985,18 |
|       | 170000          | 147000 | 197000 |           |          | 174000    | 208000 | 188000 |           |          | 244000          | 242000 | 235000 |           |          |
| 120   | 274000          | 367000 | 344000 | 320166,67 | 30218,19 | 403000    | 364000 | 315000 | 353000    | 34539,83 | 432000          | 434000 | 382000 | 405166,67 | 22843,06 |
|       | 296000          | 321000 | 319000 |           |          | 337000    | 387000 | 312000 |           |          | 403000          | 407000 | 373000 |           |          |

**Table S3. Primer sequences for plasmid cloning and mutagenesis.**

| Name                  | Sequence                                            |
|-----------------------|-----------------------------------------------------|
| pMIR-RNL-TK for       | GAAGTACCGAAAGGTCTTACCG                              |
| pMIR-RNL-TK rev       | CCAAGCTAGCGGCCGCATACAA                              |
| pMIR-BCL2 Mut BS1 for | CCAGTACCTTAAGCCC <b>ACGTGGT</b> GTATATTCATATATTTG   |
| pMIR-BCL2 Mut BS1 rev | CAAAATATATGAATATACACC <b>ACGTGGG</b> CCTTAAGGTACTGG |
| pMIR-BCL2 Mut BS2 for | CTCCGAATGTCTGGAAT <b>TCGCG</b> AGGAGCTCAGAATTCCAC   |
| pMIR-BCL2 Mut BS2 rev | GTGGAATTCTGAGCTCCT <b>TCGCG</b> ATTCCAGACATTCCGAG   |
| 5'-SMAD4-SpeI         | GG <u>ACTAGT</u> GTCTTTTACCGTTGGGG                  |
| 3'-SMAD4-SacI         | <u>CGAGCTCC</u> CAACCTTGTGCCTAG                     |
| pMIR-SMAD4 Mut for    | GAATAATCCAGTATTT <b>TCGCG</b> AGTTAAAGGCAGAGAAG     |
| pMIR-SMAD4 Mut rev    | CTTCTCTGCCTTTAACT <b>TCGCG</b> AAATACTGGATTATTC     |
| 5'-FRAT1-SpeI         | GG <u>ACTAGT</u> GCACAGCAGCTTATAATGG                |
| 3'-FRAT1-SacI         | <u>CGAGCTCG</u> GAGATCAGAGAAATGTG                   |
| pMIR-FRAT1 Mut for    | GGAATTGTGGCTATCT <b>TCGCG</b> AATAGGATTTTAACTTAAC   |
| pMIR-FRAT1 Mut rev    | GTTAAGTTAAAATCCTAT <b>TCGCG</b> AGATAGCCACAATTCC    |

Restriction sites are underlined, mutated sites are indicated in bold

**Table S4. Clinical data on patients for immunohistochemistry.**

| ID   | Age   | Sex | WHO grading | Histological subtype | Ki-67 labeling index |
|------|-------|-----|-------------|----------------------|----------------------|
| 2358 | 63,95 | f   | I           | meningothelial       | 4                    |
| 2364 | 56,49 | m   | I           | meningothelial       | 2                    |
| 2368 | 62,79 | m   | I           | microcystic          | <1                   |
| 2382 | 79,20 | m   | I           | meningothelial       | 1                    |
| 2401 | 58,08 | f   | I           | meningothelial       | 3                    |
| 2415 | 65,88 | f   | I           | fibroblastic         | 2                    |
| 2431 | 47,24 | f   | I           | meningothelial       | <5                   |
| 2437 | 62,43 | f   | I           | transitional         | 1                    |
| 2443 | 46,59 | f   | I           | fibroblastic         | 8                    |
| 2442 | 61,95 | m   | I           | angiomatous          | 4                    |
| 2464 | 70,87 | m   | I           | meningothelial       | 3                    |
| 2463 | 63,15 | m   | I           | meningothelial       | 1                    |
| 2466 | 73,02 | f   | I           | meningothelial       | 3                    |
| 2498 | 81,58 | f   | I           | meningothelial       | 3                    |
| 2503 | 33,01 | f   | I           | fibroblastic         | 5                    |
| 2505 | 47,56 | f   | I           | meningothelial       | 2                    |
| 2523 | 59,57 | f   | I           | secretory            | <1                   |
| 2549 | 46,80 | f   | I           | transitional         | 5                    |
| 2558 | 51,22 | f   | I           | fibroblastic         | 2                    |
| 2564 | 72,60 | f   | I           | transitional         | N/A                  |
| 2371 | 39,30 | f   | II          | atypical             | 15                   |
| 2378 | 70,48 | m   | II          | brain invasive       | 3                    |
| 2385 | 86,61 | f   | II          | atypical             | 12                   |
| 2395 | 50,70 | m   | II          | atypical             | 20                   |
| 2399 | 68,10 | f   | II          | atypical             | 10                   |
| 2400 | 13,33 | m   | II          | atypical             | 20                   |
| 2408 | 52,16 | m   | II          | chordoid             | 20                   |
| 2423 | 80,42 | f   | II          | atypical             | 10                   |
| 2426 | 70,21 | f   | II          | brain invasive       | 10                   |
| 2427 | 46,92 | m   | II          | atypical             | 5                    |
| 2547 | 60,44 | f   | III         | anaplastic           | 20                   |
| 2553 | 87,52 | f   | III         | anaplastic           | 20                   |
| 2581 | 87,71 | m   | III         | anaplastic           | 20                   |
| 2594 | 74,12 | m   | III         | anaplastic           | 50                   |
| 2410 | 75,33 | m   | III         | anaplastic           | 30                   |

**Table S5. Results of immunohistochemistry.**

| ID   | Age   | Sex | WHO grading | Histological subtype | FRAT1 | SMAD4 |
|------|-------|-----|-------------|----------------------|-------|-------|
|      |       |     |             |                      | IRS   | IRS   |
| 2358 | 63,95 | f   | I           | meningothelial       | 12    | 4     |
| 2364 | 56,49 | m   | I           | meningothelial       | 12    | 8     |
| 2368 | 62,79 | m   | I           | microcystic          | 12    | 6     |
| 2382 | 79,20 | m   | I           | meningothelial       | 4     | 4     |
| 2401 | 58,08 | f   | I           | meningothelial       | 8     | 8     |
| 2415 | 65,88 | f   | I           | fibroblastic         | 4     | 2     |
| 2431 | 47,24 | f   | I           | meningothelial       | 8     | 0     |
| 2437 | 62,43 | f   | I           | transitional         | 8     | 4     |
| 2443 | 46,59 | f   | I           | fibroblastic         | 3     | 0     |
| 2442 | 61,95 | m   | I           | angiomatous          | 4     | 3     |
| 2464 | 70,87 | m   | I           | meningothelial       | 4     | 0     |
| 2463 | 63,15 | m   | I           | meningothelial       | 4     | 0     |
| 2466 | 73,02 | f   | I           | meningothelial       | 8     | 4     |
| 2498 | 81,58 | f   | I           | meningothelial       | 8     | 3     |
| 2503 | 33,01 | f   | I           | fibroblastic         | 4     | 0     |
| 2505 | 47,56 | f   | I           | meningothelial       | 4     | 8     |
| 2523 | 59,57 | f   | I           | secretory            | 4     | 0     |
| 2549 | 46,80 | f   | I           | transitional         | 1     | 3     |
| 2558 | 51,22 | f   | I           | fibroblastic         | 0     | 0     |
| 2564 | 72,60 | f   | I           | transitional         | 8     | 3     |
| 2371 | 39,30 | f   | II          | atypical             | 4     | 0     |
| 2378 | 70,48 | m   | II          | brain invasive       | 3     | 6     |
| 2385 | 86,61 | f   | II          | atypical             | 4     | 2     |
| 2395 | 50,70 | m   | II          | atypical             | 4     | 3     |
| 2399 | 68,10 | f   | II          | atypical             | 4     | 0     |
| 2400 | 13,33 | m   | II          | atypical             | 8     | 8     |
| 2408 | 52,16 | m   | II          | chordoid             | 12    | 0     |
| 2423 | 80,42 | f   | II          | atypical             | 2     | 1     |
| 2426 | 70,21 | f   | II          | brain invasive       | 4     | 4     |
| 2427 | 46,92 | m   | II          | atypical             | 8     | 4     |
| 2547 | 60,44 | f   | III         | anaplastic           | 0     | 3     |
| 2553 | 87,52 | f   | III         | anaplastic           | 3     | 3     |
| 2581 | 87,71 | m   | III         | anaplastic           | 8     | 4     |
| 2594 | 74,12 | m   | III         | anaplastic           | 6     | 3     |
| 2410 | 75,33 | m   | III         | anaplastic           | 8     | 3     |

Immuno-Reactive-Score (IRS) for FRAT1 and SMAD4 immunostaining



CAAGCTACATGACTTTTGTCTTTAAATAACTTATCTACCACCTCATTTGTA CTCTTGTACTCTTGATTACTTACAAAATTCCTTTCAGTAAACAC  
CTAATTTTCTTCTGTAAAAAGTTTGGTGATTTAAGTTTTATTGGCAGT TTTTATAAAAAAGACATCTTCTCTAGAAAATTGCTAACTTT  
AGGTCCATTTTACTGTGAATGAGGAATAGGAGTGAGTTTTTAGAATAACAGATTTTTTAAAAATCCAGATGATTTGATTA AACCTT  
AATCATA CATTGACATAATT CATTGCTTCTTTTTTTTTGAGATATGGAGTCTTGCTGTGTTGCCAGGCAGGAGTGCAGTGGTATG  
ATCTCAGCTCACTGCAACCTCTGCCTCCCGGGTCAACTGATTCTCCTGCCTCAGCCTCCCTGGTAGCTAGGATTACAGGTGCC  
GCCACCATGCCTGGCTAACTTTTGTAGTTTTAGTAGAGACGGGGTTTTGCCTGTTGGCCAGGCTGGTCTTGAACCTCTGACCTCA  
AGTGATCCATCCACCTTGGCCTCCCAAAGTGCTGGGATTACGGGCGTGAGCCACTGTCCCTGGCCTCATTGTTCCCTTTTCTACT  
TTAAGGAAAAGTTTTCATGTTAATCATCTGGGGAAAAGTATGTGAAAAATATTTGTTAAGAAGTATCTCTTTGGAGCCAAGCCACC  
TGCTTTGGTTTTCTTTCTACTAAGAGCCATAAAGTATAGAAAATACTTCTAGTTGTTAAGTGCTTATATTTGTACCTAGATTTAGTC  
ACACGCTTTTTGAGAAAAATCTAGTATGTTATGATCAGCTATTCCTGAGAGCTTGGTTGTTAATCTATATTTCTATTTCTTAGTG  
GTAGTCATCTTTGATGAATAAGACTAAAAGATTCTCACAGGTTTTAAAAATTTATGTCTACTTTAAGGGTAAAAATATGAGGTTATG  
GTTCTGGGTGGGTTTTCTCTAGCTAATTCATATCTCAAAGAGTCTCAAATGTTGAATTT CAGTGCAAGCTGAATGAGAGATGAG  
CCATGTACACCCACCGTAAGACCTCATTCCATGTTTTGTCCAGTGCCCTTTCAGTG CATTATCAAAGGGAATCCTTCATGGTGTTC  
CTTTATTTTCCGGGGAGTAGATCGTGGGATATAGTCTATCTCATTTTTAATAGTTTACCGCCCTGGTATACAAAGATAATGACA  
ATAAATCACTGCCATATAACCTTGCTTTTTCCAGAAAACATGGCTGTTTTGTATTGCTGTAAACCAATAAGTTGCTTATACCA  
TTCTCCTGTGAACAGTGCAGATTTACAGTTTACAGTTGCTGGCTTAAGGAGAGCCATACTTGAGACATGTGAGTAACTGAACCT  
CATATFAGCTGTGCTGCATTT CAGACTTAAAAATCCATTTTTGTGGGGCAGGGTGTGGTGTGTAAAGGGGGGTGTTTGTAAACAA  
GTTGAAGGCAAAAATAAAATGTCCTGTCTCCAGATGATATACATCTTATTATTTTTTAAAGTTTATTGCTAATTTGTAGGAAGGTGA  
GTTG CAGGTATCTTTGACTATGGTCATCTGGGGAAAGGAAAAATTTTACATTTTACTATTAATGCTCCTTAAAGTGTCTATGGAGGTT  
AAAGAATAAAATGGTAAATGTTTCTGTGCCTGGTTTTGATGGTAACTGGTTAATAGTTACTCACCATTTTATGCAGAGTACATTA  
GTTTACACCCCTTTCTGAGAGCCTTTTTGGGAGAAGCAGTTTTTATTCTCTGAGTGGAACAGAGTTCTTTTTTGTGATAATTTCTAGT  
TTGCTCCTTTCGTTATTG CCAACTTTACTGGCATTTTATTTAATGATAGCAGATTGGGAAAAATGGCAAATTTAGGTTACGGAGGT  
AAATGAGTATATGAAAACAATTACCTCTAAAGCCAGTTAAACAATTTTGTAGGTGGGGTACACTCAGCTTAAAGTAATGCATT  
TTTTTTTTCCCGTAAAGGCAGAATCCATCTTGTTCGAGATAGCTATCTAAATAATCTCATATCCTCTTTTGCAAAGACTACAGAGA  
ATAGGCTATGACAATCTTGTTC AAGCCTTTCCATTTTTTTCCCTGATAACTAAGTAATTTCTTTGAAACATACCAAGAAGTATGTA  
AAAAGTCCATGGCCTTATTCATCCACAAAGTGGCATCCTAGGCCCAGCCTTATCCCTAGCAGTTGTCCAGTGCTGCTAGGTTGC  
TTATCTTGTTTATCTGGAATCACTGTGGAGTGAAATTTTTCCACATCATCCAGAATTTGCCTTATTTAAGAAGTAAAACGTTTTTAAT  
TTTTAGCCTTTTTTTTTGGTGGAGTTATTTAATATGTATATCAGAGGATATACTAGATGGTAAACATTTCTTTCTGTGCTTGGCTATC  
TTTTGTGGACTTCAGGGGCTTCTAAAAACAGACAGGACTGTGTTGCCTTTACTAAAATGGTCTGAGACAGCTATGGTTTTTGAATTTTT  
AGTTTTTTTTTTTTTAAACCCTTCCCCTCTGGTCTCTTCCCCTCTCTGATAATTACCATTTCATATGTGAGTGTTAGTGTGCCTCC  
TTTTAGCATTTTCTTCTTCTTCTGATTCTTCATTTCTGACTGCCTAGGCAAGGAAACCAGATAACCAAACCTTACTAGAACGT  
TCTTTAAAAACAAGTACAACTCTGGGACAGGACCCAAGACACTTTCCTGTGAAGTGCTGAAAAAGACCTCATTGTATTGGCAT  
TGATATCAGTTTGATGTAGCTTAGAGTGTCTCTGATCTTGTCTGATTT CAGGTAGTTGAGATAGAGAGAAGTGAGTCATATT  
CATATTTTCCCCCTTAGAATAATTTTTGAAAAGTTTTCATTTGCTTCCACTTGAATGCTGCTTTACAAAAACTGGGGTTACAAGG  
GTTACTAAATFAGCATCAGTAGCCAGAGGCAATACCGTTGTCTGGAGGACACCAGCAAACAACACACAACAAAGCAAAACAAACC  
TTGGGAAACTAAGGCCATTTGTTTTGTTTTGGTGTCCCCTTTGAAGCCCTGCCTTCTGGCCTTACTCCTGTACAGATATTTTTTGA  
CCTATAGGTGCCCTTTATGAGAATTGAGGGTCTGACATCCTGCCCAAGGAGTAGCTAAAAGTAATTGCTAGTGTTTTTCAGGGATTT  
TAAACATCAGACTGGAATGAATGAATGAACTTTTTGTCTTTTTTTTTTCTGTTTTTTTTTTTCTAATGTAGTAAGGACTAAGGAA  
AACCTTTGGTGAAGACAATCATTCTCTCTGTTGATGTGGATACTTTTTACACCCGTTTATTTAAATGCTTTCTCAATAGGTCCAG  
AGCCAGTGTCTTGTTC AACCTGAAAAGTAATGGCTCTGGGTTGGGCCAGACAGTTGCACTCTCTAGTTTGGCCTCTGCCACAAAT  
TTGATGTGTGACCTTTGGGCAAGTCATTTATCTTCTCTGGCCTTAGTTGCCTCATCTGTA AAAATGAGGGAGTTGGAGTAGATTA  
ATTATTCAGCTCTGAAAATCTAAGTGACCTTGGCTACCTTG CAGCAGTTTTGGATTTCTTCTTATCTTTGTTCTGCTGTTTGA  
GGGGCTTTTTACTTTATTTCCATGTTATTTCAAAGGAGACTAGGCTTGATATTTTATTACTGTTCTTTTATGGACAAAAGGTTACA  
TAGTATGCCCTTAAAGACTTAAATTTAACC AAAAGGCTTAGCACCACCTTAGGGGCTGCAATAAAACACTTAAACGCGCGTGCACACGC  
GCGCGGCACACACACACACACACACACACACACACACAGGTCAGAGTTTTAAGGCTTTTCGAGTCATGACATTTCTAGCTTTTTGAAT  
TGCGTGACACACACACACACACTCTGGTCAGAGTTTTATTAAGGCTTTTCGAGTCATGACATTTATAGCTTTTTGAGTTGGT  
GTGTGTGACACCACCTCCTAAGTGGTGTGTGCTTGTAAATTTTTTTTTTTCAGTGAAAAATGGATTGAAAACTGTTGTTAATGCTT  
AGTGATATTATGCTCAAAAACAAGGAAATTCCTTTGAACCGTGTCAATTA AACTGGTTTTATATGACTCAAGAAAAACAATACCAGTA  
GATGATTATTAACCTTATTTCTTGGCTCTTTTTTAGGTCCATTTTGATTAAGTGACTTTTTGGCTGGATCATT CAGAGCTCTCTTCTA  
GCCTACCCTTGGATGAGTACAATTAATGAAATTCATATTTTCAAGGACCTGGGAGCCTTCTTGGGGCTGGGTTGAGGGTGGGGG  
GTTGGGGAGTCTGTGAGAGCCAGCTTTGTGTTAGCTGGAGAGGAAGGGATGAAACCAGCTGCTGTTGCAAAGGCTGCTTGTCA  
TTGATAGAAGACTACGGGCTTGGATTGATTAAGACTAAACATGGAGTTGGCAAACCTTCTTCAAGTATTGAGTTCTGTTCAAT  
GCATTTGGACATGTGATTTAAGGGAAAAGTGTGAATGCTTATAGATGATGAAAACTGGTGGGCTGCAGAGCCAGTTTAGAAGAA  
GTGAGTTGGGGGTTGGGGACAGATTTGGTGGTGGTATTTCCCAACTGTTTCTCCTCCCTAAAATTCAGAGGAATGCAGCTATGCCAG  
AAGCCAGAGAAGAGCCACTCGTAGCTTCTGCTTTGGGGACAACTGGTCAGTTGAAAAGTCCAGGAGTTCTTTGTGGCTTTCTGT  
ATACTTTTTGCCTGGTTAAAGTCTGTGGCTAAAAAATAGTGC AAACCTTTCTTGAGAACTCTGTAACAAAAGTATGTTTTTTGATTA  
AGAGAAAAGCCA ACTAAAAA AAAAAAAAAAAAAAAAAA

## 2. Homo sapiens frequently rearranged in advanced T-cell lymphomas 1 (FRAT1), mRNA

The stop codon is highlighted in red, the potential binding site for miR-34a-3p is highlighted in green and the complete fragment cloned into pMIR-RNL-TK is underlined.

NCBI Reference Sequence: NM\_005479.3

>gi|197313686|ref|NM\_005479.3| Homo sapiens frequently rearranged in advanced T-cell lymphomas 1 (FRAT1), mRNA

GGATTCCGGCTCCCGCGGCTGCAGGCGCGGGCTAGAGTGCCTGGCGGGCTCCGGCTTCCGCGTCCGCCCCGGCCCCGGTCCAGAC  
CTTAGTCTTCAGCTCCCGCCCCGCTCCGCCGCGGCCACCGCGCCCCCGGCAGCCGAGCCCCAGCGACGCCCGCACAGCTCCG  
GGTGCCAGACAGGGGGCCATGCCGTGCCGAGGGAGGAGGAAGAGGAAGCCGGCGAGGAGGCGGAGGGGGAGGAAGAGGAGGAG  
GACAGCTTCTCCTACTGCAGCAGTCAGTGGCGCTGGGCAGCTCGGGCGAGGTGGACC GGCTGGTGGCCAGATCGGCGAGACGC  
TGCAGCTGGACGCGGCGCAGCACAGCCCCGGCTCGCCGTGCGGGCCCCGGGGGCGCCGTGCGGGCCCCGGGGCCCCCTGGCTGC  
GGCGGTGCCGGCGGACAAGGCCAGGTCCCCGGCGGTGCCGCTGCTGCTGCCGCCCGCGTTGGCGGAGACTGTGGGCCCGGGCGCCC  
CCTGGGGTCTCGCTGCGCCTGGGGGACCGCGCCCGGTGCGGGGCCGCGCTGCGCCCTACTGCGTGGCCGAGCTCGCCACAG  
GCCCCAGCGCGCTGTCCCCACTGCCCCCTCAGGCCGACCTTGATGGGCCTCCGGGAGCTGGCAAGCAGGGGCATCCCCGAGCCGCT  
GTCGGGTCCGTGCCGGCGAGGATGGCTCCGGGGCGCCGCCCTCCCGCCGCTGCAGCAGCGACGCGGGTCCCAACCAGAAAACC  
CGCACAGGCGACGACGCCCGCACCCGGCTTCTGCAGCAGCTAGTGTCTCTTGAAAACCTCATCAAGGAGGCCGTGCGAAGGCTTC  
ATTCGCGACGGCTGCAGTTACGTGCAAAAGCTTCCCAACGCCCGCTCCTGGGACCTCTGTGCGCCCCGGTGCATGAACCCCTTC  
GCCTCGCAGCCCTCGCGCGGCTGCAGTGACCCTGGCGCCTCCGGGAGGGCGCAGCTCAGAACTGGCGACGGCGTTCCTGTGCCT  
GGCAGC **TA** CACGCCCGGGGTGGCCACAGCGCCAGCCTCAGACTGGAGGGCAAGGGGTTCCTTGAGGGCTGCAGTTCTACTCAG  
GCTGGTGGAGAACTCTGGCTTTTGAAGCGAGAGTAAAAAGCTAATGACGAGGAACCGAAAAATCGCGAGTGTTCGCGGGTAAC  
TGGGTGGAGGGCCAAAATATTTGGAATGAAGGACTTTGGCCCTATTTAAGGCAGATTTTACAGAGCGCACCTCAAACGTACAAG  
TCAGTAGGACTCCTTATTTGGCGTGACCCGACCTGGCCGCGGAGCCTGCATTTCTCGCAGCCTCTCAGTGCCTCCAGCCCCGC  
GACCATGTGGCCACAATCCACGCTTCTCCGGATCGCGGTGCGCCGGAACACGAGGATGATGCCAGTTACTTTGCTTTTACCTTTT  
CAGGGCTGGCTCCTGATCCACTTTGGGGGAGGAGAACATGAGTAGATAATTTAGGGTGCAGCCCAATCTGCCAGACTTAAAAAAA  
ACCATCTTGTGTCTTTGGAGGTGCTGCTTAATAACAAAACATGCGGTGCCATGAAGGGACCTTTGGGGGTGAATAGGAGTTAAC  
CCCTGCGCTCTCTTTGCAACTGTCTCTCTTCTCAGAGTGGTGGGGAAAGGCTGTACGACACGGGTGGGGAAAGGAGGTGGGGGCG  
GGGAGTATTGAATGGTGGTGGAAAGGGTAGAGAGGCGCGGAGTGAACCCACGCCCTGTCTAAAGTGTATTTTCAGAGCCGGCCCC  
CCTCTCCTCGGTTCAAGGTCACTGTTTCTGGGCACGCACTGGGTTGCGGGACAGAGTAGCCAGGTTCTGCCGGTGTCTGGAGAA  
GAGCGCAGTGTTTTGCAAGTGTGAGTCTCTGAGGACACGCGCTGCGCCACCGCGGTGTGGGAAAGCGCGGACGTGCTG  
GGCGGTGTGCTTCGGTAGGCGACCACCGCCCTGGCCGCGCTCCGGGCTTTCACGGAAACTCCCGAGACCGGGCCCTGGGTTC  
TCTCTCTACTCGGCTCTGCAGTCTACTCAAGCGGGTGGCTCTGGGATCTGGGGGCTGGGTGGGGGCTAGGGAGACGCCA  
TGTGATGGACACTCCAGGGACACACAGCCTAGCACAGCAGCTTATAATGGGCTCTCCGGGGCCATTTGCAATAACAGCTGCAATT  
CCCTGGATAGACGAGTTGATTTCTCCCTCTGCCCTCCCCCAGCCATGCCAGCTGGCCTTTGTAAAGTGCAGGAAAACCGAGTAGA  
AAATGTGACCCTCCAAATGGAGAAGCTGCAGGCTTTGCCATTGTGAACCATGGTGAAGTGCCTTGGAAACATACTGTTCACTCACTC  
TAAAGGCGCTGAGACTGTGCTGTTGTTCTCGTTTTTATAGTCAATGGCTTGTTCATCATCCAGATGTGGCTACTGACATATCTAC  
ACTTCGCACCGGAGTGTCTGGAATGTGGCTATC **CTGATT** ATAGGATTTTAACTTAACTGAAATGCCTGCTTTGAATAAATGTGT  
TGGTTTTTTGTGGTTTTATTTTATACTTGCCATCAGTAAAAAGATGTACAGAACACATTTCTCTGATCTCCATAAACATGA  
AAACACTTGAAATCTC



### 3. Homo sapiens B-cell CLL/lymphoma 2 (BCL2), transcript variant alpha, mRNA

The stop codon is highlighted in red, the potential binding sites for miR-34a-3p are highlighted in green and the complete fragment that was *de novo* synthesized and cloned into pMIR-RNL-TK is underlined

NCBI Reference Sequence: NM\_000633.2

```
>gi|72198188|ref|NM_000633.2| Homo sapiens B-cell CLL/lymphoma 2 (BCL2), transcript variant alpha, mRNA
TTTCTGTGAAGCAGAAGTCTGGGAATCGATCTGGAAATCCTCCTAATTTTTACTCCCTCTCCCCGCGACTCCTGATTCATTGGGA
AGTTTCAAATCAGCTATAACTGGAGAGTGTGAAGATTGATGGGATCGTTGCCTTATGCATTTGTTTTGGTTTTACAAAAAGGAA
ACTTGACAGAGGATCATGCTGTACTTAAAAAATACAACATCACAGAGGAAGTAGACTGATATTAACAATACTTACTAATAATAAC
GTGCTCATGAAATAAAGATCCGAAAGGAATTTGGAATAAAAAATTTCTGCATCTCATGCCAAGGGGGGAAACACCAGAATCAAGTG
TTCCGCGTGATTGAAGACACCCCTCGTCCAAGAATGCAAAGCACATCCAATAAAAAATAGCTGGATTATAACTCCTCTTCTTTCTC
TGGGGGCCGTGGGGTGGGAGCTGGGGCGAGAGGTGCCGTTGGCCCCGTTGCTTTTTCTCTGGGAAGGATGGCGCACGCTGGGGAG
AACAGGGTACGATAACCGGGAGATAGTGATGAAGTACATCCATTATAAGCTGTGCGAGAGGGGTACGAGTGGGGATGCGGGGAGAT
GTGGGCGCCGCGCCCCGGGGGCCGCCCCGCACCGGGCATCTTCTCCTCCAGCCCGGGCACACGCCCATCCAGCCGCATCCC
GGGACCCGGTTCGCCAGGACCTCGCCGCTGCAGACCCGGCTGCCCGGCGCCGCGGGGGCTGCGCTCAGCCCGGTGCCACC
TGTGGTCCACCTGACCCTCCGCCAGGCCGGCGACGACTTCTCCGCGCTACCGCCGCGACTTCGCCGAGATGTCCAGCCAGCTG
CACCTGACGCCCTTACC CGCGCGGGGACGCTTTGCCACGGTGGTGGAGGAGCTCTTCAGGGACGGGGTGAAC TGGGGGAGGATTG
TGGCTTCTTTGATTTCCGTTGGGTGATGTGTGGAGAGCGTCAACCGGAGATGTCGCCCTGGTGGACAACATCGCCCTGTG
GATGACTGAGTACCTGAACCGGCACCTGCACACCTGGATCCAGGATAACGGAGGCTGGGATGCCCTTTGTGGAAC TGTACGGCCCC
AGCATGCGGCTCTGTTTTGATTTCTCCTGGCTGTCTCTGAAGACTCTGCTCAGTTTTGGCCCTGGTGGGAGCTTGCATCACCCCTGG
GTGCCTATCTGGGCCACAAGTGAAGTCAACATGCCTGCCCCAAAACAAAATATGCAAAAAGGTTCACTAAAAGCAGTAGAAAATAATATG
CATTGTGCTGATGTACCATGAAAACAAAAGCTGCAGGCTGTTTTAAGAAAAAATAACACACATATAAAACATCACACACACAGACAGA
CACACACACACACAACAATTAACAGTCTTCAGGCAAAAACGTCGAATCAGCTATTTACTGCCAAAAGGGAAAATATCATTTATTTTTT
ACATTATTAAGAAAAAAGATTTATTTATTTAAGACAGTCCCATCAAACTCCTGTCTTTGGAAATCCGACCACTAATTGCCAAG
CACCGCTTCGTGTGGCTCCACCTGGATGTTCTGTGCCTGTAAACATAGATTTCGCTTTCATGTTGTTGGCCGGATCACCATCTGA
AGAGCAGACGGATGAAAAAGGACCTGATCATTGGGGAAGCTGGCTTTCTGGCTGCTGGAGGCTGGGGAGAAGGTGTTCAATCAC
TTGCATTTCTTTGCCCTGGGGCTGTGATATTAACAGAGGGAGGGTTCTGTGGGGGAAGTCCATGCCTCCCTGGCCTGAAGAA
GAGACTCTTTGCATATGACTCACATGATGCATACCTGGTGGGAGGAAAAGAGTTGGGAAC TTCAGATGGACCTAGTACCCACTGA
GATTTCCACGCCGAAGGACAGCGATGGGAAAAATGCCCTTAAATCATAGGAAAAGTATTTTTTTTAAAGCTACCAATTGTGCCGAGAA
AAGCATTTTAGCAATTTATACAATATCATCCAGTACCTTAAAGCCCTGTGATATTTCATATATTTTGGATACGCACCCCCCA
ACTCCCAATACTGGCTCTGTCTGAGTAAGAAAACAGAATCCTCTGGAACTTGGAGGAGTGAACATTTTCGGTGACTTCCGCATCAGG
AAGGCTAGAGTTACCCAGAGCATCAGGCCGCCACAAGTGCCTGCTTTTTAGGAGACC GAAGTCCGCAGAACCTGCCTGTGTCCAG
CTTGGAGGCTGGTCTTGAAC TGAAGCTGAGCCGGGGCCCTCACTGGCTCCTCCAGGGATGATCAACAGGGCAGTGTGGTCTCCGAATG
TCTGGAACTGATGGAGCTCAGAA TCCACTGTCAAGAAAAGAGCAGTAGAGGGGTGTGGCTGGGCTGTACCCTGGGGCCCTCC
AGGTAGGCCCGTTTTACGTTGAGCATGGGAGCCACGACCTCTTAAAGACATGATCACTGTAGAGGGAAGGAACAGAGCCCTT
GGCCCTTCTATCAGAAGGACATGGTGAAGGCTGGGAACGTCAGGAGAGGCAATGGCCACGGCCATTTTGGCTGTAGCACCTT
GCACGTTGGCTGTGTGGCTTGGCCACCTGTGAGTTTTAAAGCAAGGCTTAAATGACTTTGGAGAGGGTCACAAACTCTAAAAG
AAGCATTGAAGTGAAGTGTGATGGATTAAATGACCCCTGTCTATGGAATTACATGTAAAAACATTATCTTTGTCACTGTAGTTTTGGT
TTTTATTTGAAAACTTGACAAAAAAGTTCCAGGTGTGGAATATGGGGGTTATCTGTACATCCTGGGGCATTAAAAAATAATC
AATGGTGGGGAAC TATAAAGAAGTAA CAAAAAGAGTGACATCTTCAGCAAAATAAACTAGGAAAATTTTTTTTTCTTCCAGTTTTAGA
ATCAGCCTTGAAACATTGATGGAATAACTCTGTGGCATTATTGCATTATATAACCATTTATCTGTATTAAC TTTGGAATGTACTCT
GTTCAATGTTAATGCTGTGGTTGATATTTGAAAAGCTGCTTTAAAAAATAACATGCATCTCAGCGTTTTTTTTGTTTTTAATTGT
ATTTAGTTATGGCTATACACTATTTGTGAGCAAAGGTGATCGTTTTCTGTTTGGAGATTTTTATCTCTTGATTCTTCAAAGCAT
TCTGAGAAGGTGAGATAAGCCCTGAGTCTCAGCTACCTAAGAAAAACCTGGATGTCAGTGGCCACTGAGGAGCTTTGTTTCAACC
AAGTCATGTGCATTTCCACGTCAACAGAATTGTTTATTGTGACAGTTATATCTGTTGTCCCTTTGACCTTGTCTTCTGAAGGTTT
CCTCGTCCCTGGGCAATTCGCATTTAATTCATGGTATTCAGGATTACATGCATGTTTGGTTAAACCCATGAGATTCATTCAGTT
AAAAATCCAGATGGCAATGACCAGCAGATTCAAATCTATGGTGGTTTTGACCTTTAGAGAGTTGCTTTACGTGGCCTGTTTCAAC
ACAGACCCACCCAGAGCCCTCCTGCCCTCCTTCCGCGGGGGCTTTCTCATGGCTGTCTTCAGGGTCTTCTGAAAATGCAGTGGT
GCTTACGCTCCACCAAGAAAAGCAGGAAAACCTGTGGTATGAAGCCAGACCTCCCCGGCGGGCTCAGGGAAACAGAATGATCAGACC
TTTGAATGATTTAATTTTTAAGCAAAAATATTTATTTATGAAAGGTTTACATTTGCAAAAGTGATGAATATGGAATATCCAATCCT
GTGCTGCTATCTGCCAAAATCATTTAATGGAGTCAGTTTGCAGTATGCTCCACGTGGTAAGATCCTCCAAGCTGCTTTAGAAG
TAACAATGAAGAACGTGGACGTTTTTAATATAAAGCCTGTTTTGTCTTTTGTGTTGTTCAAACGGGATTACAGAGTATTTGAA
AAATGTATATATTAAGAGGTACGGGGGCTAATTGCTGGCTGGCTGCCCTTTGCTGTGGGGTTTTGTTACCTGGTTTTAATAA
CAGTAAATGTGCCAGCCTCTTGGCCCCAGAAGTGTACAGTATTGTGGCTGCACTTGTCTAAGAGTAGTTGATGTTGCATTTTC
CTTATTGTTAAAAACATGTTAGAAGCAATGAATGTATATAAAAAGCCTCAACTAGTCATTTTTTTCTCCTCTCTTTTTTTTCATT
```

ATATCTAATTATTTTGCAGTTGGGCAACAGAGAACCATCCCTATTTTGTATTGAAGAGGGATTACATCTGCATCTTAACTGCTC  
TTTATGAATGAAAAACAGTCTCTGTATGTACTCTCTTTACACTGGCCAGGGTCAGAGTTAAATAGAGTATATGCACCTTTCCA  
AATTGGGGACAAGGGCTCTAAAAAAGCCCCAAAAGGAGAAGAACATCTGAGAACCTCCTCGGCCCTCCAGTCCCTCGTGCAC  
AAATACTCCGCAAGAGAGGCCAGAATGACAGCTGACAGGGTCTATGGCCATCGGGTCGTCTCCGAAGATTTGGCAGGGGCAGAAA  
ACTCTGGCAGGCTTAAGATTTGGAATAAAGTCACAGAATTAAGGAAGCACCTCAATTTAGTTCAAACAAGACGCCAACATTCTCT  
CCACAGCTCACTTACCTCTCTGTGTTCAAGATGTGGCCTTCCATTTATATGTGATCTTTGTTTTATTAGTAAATGCTTATCATCTA  
AAGATGTAGCTCTGGCCAGTGGGAAAAATTAGGAAGTGATTATAAATCGAGAGGAGTTATAATAATCAAGATTAATGTAATA  
ATCAGGGCAATCCCAACACATGTCTAGCTTTACCTCCAGGATCTATTGAGTGAACAGAATTGCAAATAGTCTCTATTTGTAATT  
GAACTTATCCTAAAACAAATAGTTTATAAATGTGAACTTAAACTCTAATTAATTTCCAAGTGTACTTTTAAAGGCAGTGGCTGTTTT  
TAGACTTTCTTATCACTTATAGTTAGTAATGTACACCTACTCTATCAGAGAAAAACAGGAAAAGGCTCGAAAATACAAGCCATTCTA  
AGGAAATTAGGGAGTCAAGTTGAAATTTCTATTCTGATCTTATTCTGTGGTGTCTTTTGCAGCCAGACAAAATGTGGTTACACACTT  
TTTAAAGAAATACAATTTCTACATTTGCAAGCTTATGAAGGTTCCAATCAGATCTTTATTGTTATTCAATTTGGATCTTTCAGGGAT  
TTTTTTTTTAAATTTATTTATGGGACAAAGGACATTTGTTGGAGGGGTGGGAGGGAGGAAGAATTTTTAAATGTAAAAACATTTCCAA  
GTTTGGATCAGGGAGTTGGAAGTTTTCAGAATAACCAGAACTAAGGGTATGAAGGACCTGTATTGGGGTCGATGTGATGCCTCTG  
CGAAGAACCCTGTGTGACAAATGAGAAAACATTTTGAAGTTTGTGGTACGACCTTTAGATTCAGAGACATCAGCATGGCTCAAAG  
TGCAGCTCCGTTTGGCAGTGCAATGGTATAAATTTCAAGCTGGATATGTCTAATGGGTATTTAAACAATAAATGTGCAGTTTTAA  
CTAACAGGATATTTAATGACAACCTTCTGGTTGGTAGGGACATCTGTTTCTAAATGTTTATTATGTACAATACAGAAAAAATTT  
TATAAATTAAGCAATGTGAAACTGAATTTGGAGAGTGATAATACAAGTCCCTTTAGTCTTACCAGTGAATCATTCTGTTCCATGT  
CTTTGGACAACCATGACCTTTGGACAATCATGAAATATGCATCTCACTGGATGCAAAAGAAAATCAGATGGAGCATGAATGGTACTG  
TACCGGTTTCTGACTGCCCCAGAAAAATAACTTCAAGCAAAACATCCTATCAACAACAAGGTTGTTCTGCATACCAAGCTGAG  
CACAGAAGATGGGAACACTGGTGGAGGATGGAAAAGGCTCGCTCAATCAAGAAAAATCTGAGACTATTAATAAATAAGACTGTAGT  
GTAGATACTGAGTAAATCCATGCACCTAAACCTTTTGGAAAATCTGCCGTGGGCCCTCCAGATAGCTCATTTCATTAAGTTTTTC  
CCTCCAAGGTAGAATTTGCAAGAGTGACAGTGGATTGCATTTCTTTTGGGGAAGCTTTCTTTTGGTGGTTTTGTTTATTATACCT  
TCTTAAGTTTTCAACCAAGGTTTGTCTTTGTTTTGAGTACTGGGGTATTTTTGTTTTAAATAAAAAATAAGTGTACAATAAGTG  
TTTTTGTATTGAAAGCTTTTGTATCAAGATTTTCATACTTTTACCTTCCATGGCTCTTTTAAAGATTGATACTTTTAAAGAGGTG  
GCTGATATTTGCAACACTGTACACATAAAAAATACGGTAAGGATACTTTACATGGTTAAGGTAAAGTAAAGTCTCCAGTTGGCCA  
CCATTAGCTATAATGGCACTTTGTTTTGTGTTGTTGGAAAAAGTCACATTGCCATTAACCTTTCCTTGTCTGTCTAGTTAATATTG  
TGAAGAAAAATAAAGTACAGTGTGAGATACTG
